# Supplementary material for: Gelatin-templated mesoporous titania for photocatalytic air treatment and application in metal chalcogenide nanoparticle-sensitized solar cells
Source: Royal Society of Chemistry journal article supplement (doi:10.1039/c2pp25196e), 2012-09-04
Supplement: c2pp25196e.pdf [file c2pp25196e.pdf]

## Supporting information

# Gelatin-templated mesoporous titania for photocatalytic air treatment and application in metal-chalcogenide nanoparticle-sensitized solar cells

Oleksandr L. Stroyuk,<sup>\*a</sup> Olexandra Ye. Rayevska<sup>a</sup>, Vitaly V. Shvalagin<sup>a</sup>,  
Stepan Ya. Kuchmiy<sup>a</sup>, Dmitry V. Bavykin<sup>b</sup>, Eugene A. Streltsov<sup>c</sup>, and Sergey K. Poznyak<sup>d</sup>

<sup>a</sup>*L.V. Pysarzhevsky Institute of Physical Chemistry of National Academy of Sciences of Ukraine, 31 prosp. Nauky, 03028, Kyiv, Ukraine.*

<sup>b</sup>*Materials Engineering and Energy Technology Research Groups, Faculty of Engineering and the Environment, University of Southampton, Southampton SO17 1BJ, United Kingdom*

<sup>c</sup>*Belorussian State University, Faculty of chemistry, 14 Leningradskaya str., 220030, Minsk, Belarus.*

<sup>d</sup>*Institute for Physico-Chemical Problems of Belorussian State University, 14 Leningradskaya str., 220030, Minsk, Belarus.*

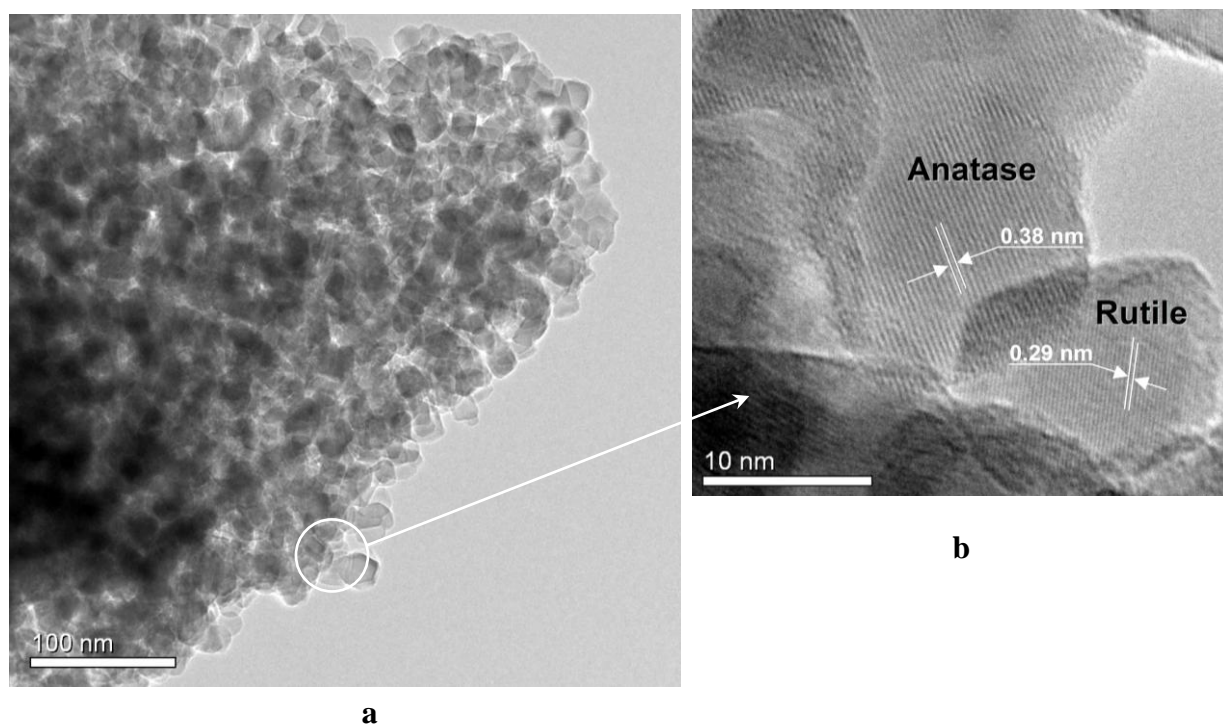

Fig. S1. TEM (a) and HRTEM (b) images of the gelatin-templated mesoporous TiO<sub>2</sub>.

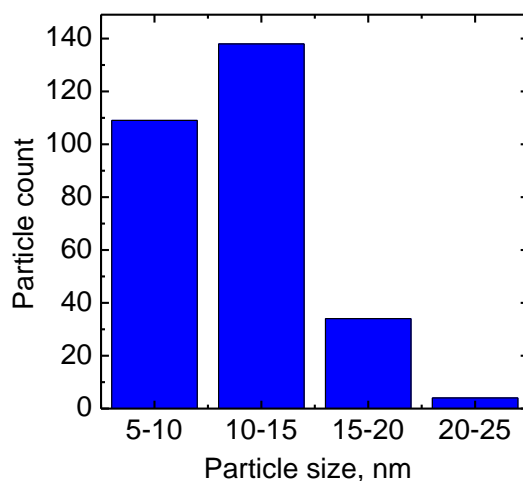

Fig. S2. Size distribution of  $\text{TiO}_2$  nanocrystallites in the gelatin-templated mesoporous titania (from TEM data).

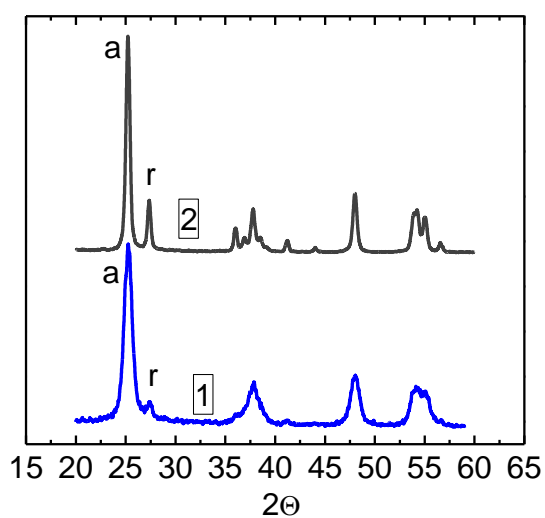

Fig. S3. X-ray diffractograms of the gelatin-templated mesoporous  $\text{TiO}_2$  (curve 1) and the commercial  $\text{TiO}_2$  Degussa P25 (curve 2). Symbols “a” and “r” denote the characteristic anatase and rutile reflections used to estimate the phase composition of the meso- $\text{TiO}_2$  relative to Degussa P25.

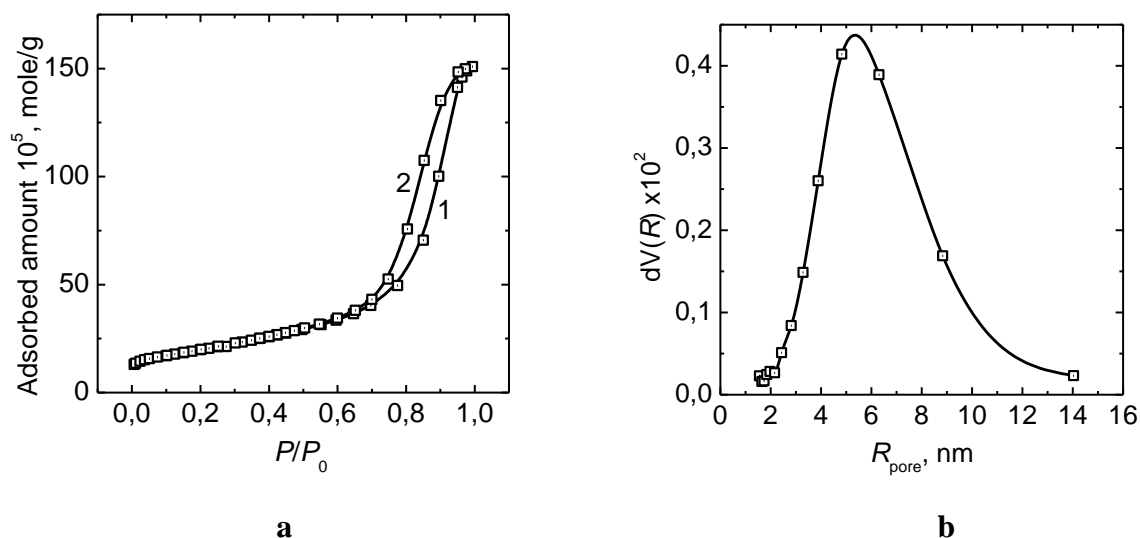

Fig. S4. (a) Isotherms of nitrogen adsorption (curve 1) and desorption (curve 2) at 70 R for the gelatin-templated mesoporous titania. (b) Pore size distribution for the meso-TiO<sub>2</sub> (produced in BJH model).

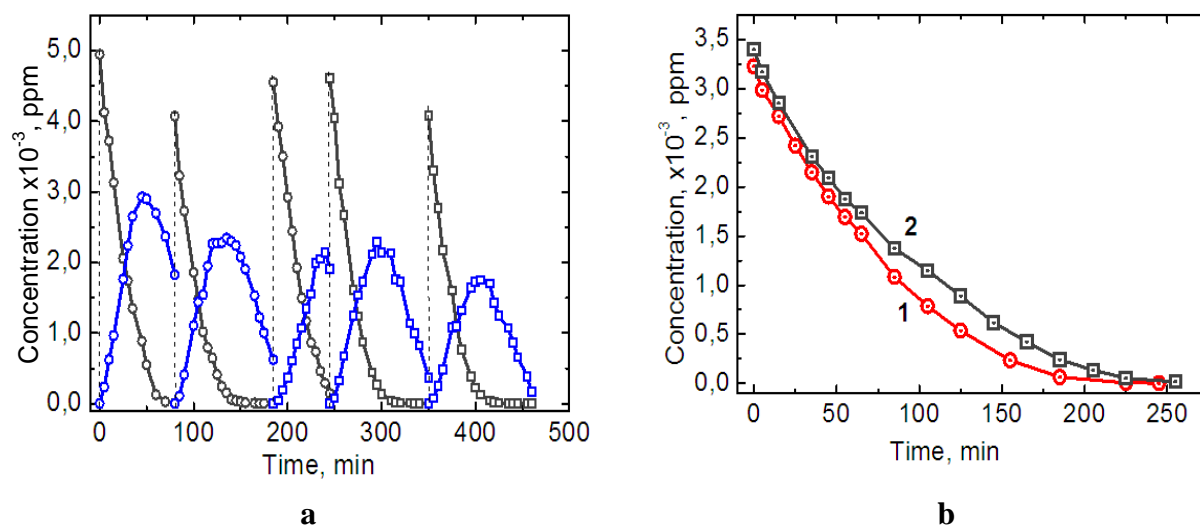

Fig. S5. (a) Kinetic curves of the photocatalytic ethanol oxidation (black curves) and acetaldehyde formation and oxidation (blue curves) repeated consequently 5 times on the same load of the gelatin-templated mesoporous TiO<sub>2</sub>. (b) Kinetic curves for the photocatalytic oxidation of acetone in the presence of mesoporous TiO<sub>2</sub> (curve 1) and Degussa P25 (curve 2).

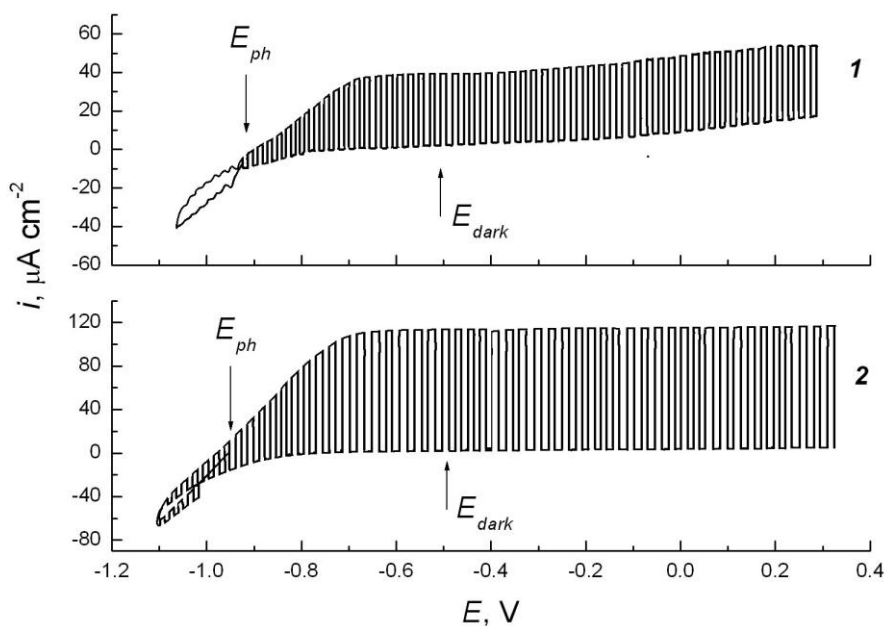

Fig. S6. Current–voltage characteristics of the samples of ITO/TiO<sub>2</sub>/CdS-4 (curve 1) and ITO/TiO<sub>2</sub>/CdS-10 (curve 2) registered in aqueous 0.1 M Na<sub>2</sub>S solution with the modulation of illumination.  $E_{dark}$  and  $E_{ph}$  – the stationary potentials of the samples in the dark and under the illumination, respectively. The samples were illuminated by the unfiltered (“white”) light of a xenon lamp.

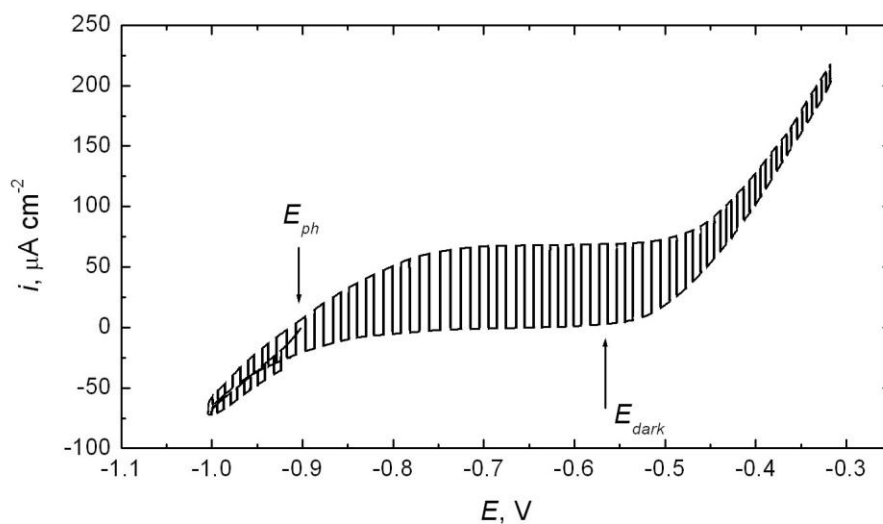

Fig. S7. Current–voltage characteristics of the sample of ITO/TiO<sub>2</sub>/PbS-10 registered in aqueous 0.1 M Na<sub>2</sub>S solution with the modulation of illumination. The sample was illuminated by the unfiltered (“white”) light of a xenon lamp.
